# Supplementary material
Source: publisher site journal article supplement (https://www.dovepress.com/article/355720)
Supplement: Supplementary file 1 [file get_supplementary_file.php]

**
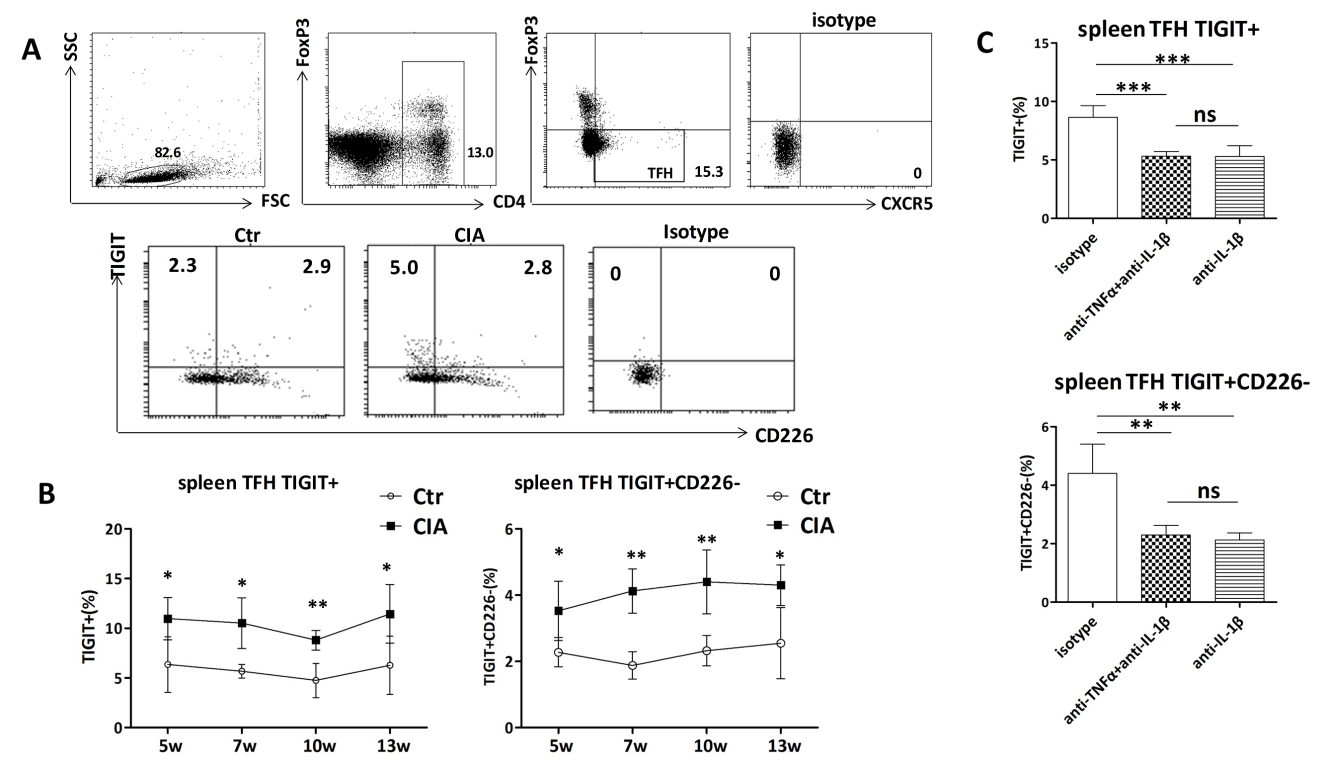
**

**Supplementary Figure S1** Changes in TIGIT and CD226 expression level in CIA mouse TFH cells.CIA mouse spleen lymphocytes at 5w, 7w, 10w, and 13w (n = 4 per timepoint) were obtained and CD226 and TIGIT expression levels on the CD4+CXCR5+FoxP3- TFH cell surface were detected with flow cytometry. (**A**) Representative flow cytometry plots show the division of TFH cells in the CIA mouse spleen CD4 cells at 10w and TIGIT and CD226 expression in TFH cells. The numbers indicate the percentages of corresponding quadrants in the TFH cells. The isotype staining control is also shown. (**B**) Comparison of the ratios of TIGIT+ and TIGIT+CD226- subsets in the spleen TFH cells of CIA mice and control DBA/1 mice (n = 4 pairs per timepoint) after the first immunization. Data are the mean ± SD. Data are from a single experiment representative of two experiments (n = 4 mice per timepoint per experiment). (**C**) Comparison of TIGIT+ and TIGIT+CD226- cell percentages in TFH cells of control and antibody-treated CIA mice at 10w (n = 4 per group). Data are from a single experiment representative of two experiments (n = 4 mice per group per experiment). Data are the mean with SD. Results were compared using Student’s t test. **P < 0.01; *P < 0.05; ns, not significant.

**Abbreviations:** CIA, Collagen-induced arthritis; Ctr, control; SD, standard deviation; TFH,follicular T helper cell; TFR,follicular regulatory T cell.

**
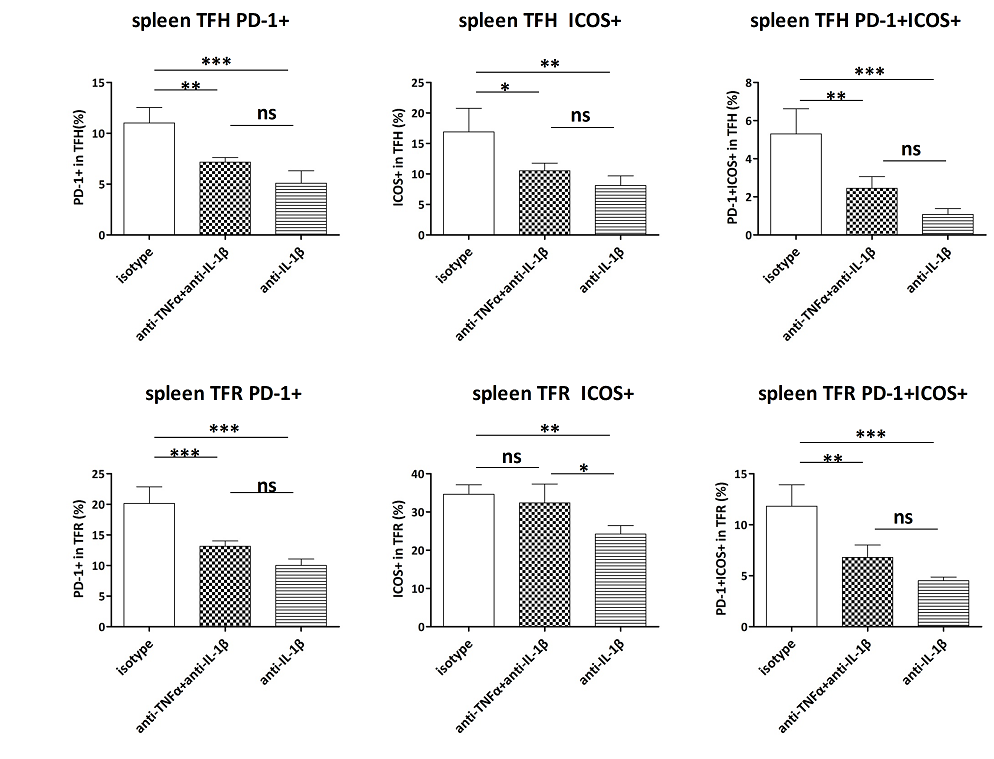
**

**Supplementary Figure S2** Analyses of the changes in PD-1 and ICOS on the surface of TFH and TFR cells from CIA mice before and after anti-inflammatory treatment.CIA mice were injected with anti-IL-1β or anti-TNFα+anti-IL-1β 1 week before the 10w timepoint. The treated mice were sacrificed at 10w and the PD-1+, ICOS+, and PD-1+ICOS+ subset percentages in the spleen TFH and TFR cells were analyzed and compared with that of age-matched control CIA mice injected with isotype IgG (n = 4 per group). Data are from a single experiment representative of two experiments (n = 4 mice per group per experiment). The data are the mean with SD. Results were compared using Student’s t test. **P < 0.01; *P < 0.05; ns, not significant.

**Abbreviations:** CIA, Collagen-induced arthritis; Ctr, control; SD, standard deviation; TFH,follicular T helper cell; TFR,follicular regulatory T cell.
